differences in the series, Stern having searched for all cases rather than studying only those who sought treatment.

There has been no report of such an illness in an individual administering anesthesia, though the lesion probably occurs occasionally. Anesthesiologists should consider the possibility of herpetic whitlow whenever a finger infection occurs. In suspected cases, surgical treatment should be limited to relieving tension in tense vesicles and bullae lest, as Stern and Hambrick caution, severe infection with further ulceration and a protracted course ensues. Often, the illness may be aborted early in its course by applying to a vesicle idoxuridine (Stoxil—Smith, Kline & French), a pyrimidine analog which irreversibly inhibits thymidine incorporation into viral DNA. Infections which appear pyogenic when first seen should be given a trial of soaks and an appropriate antibiotic; with incision and drainage later, depending on the response to conservative therapy. Finally, anesthesiologists should take suitable precautions when treating patients who may expose them to infectious material. In addition to patients with herpetic lesions and recent convalescents from herpes, these include young children (oral viruses are found in as many as 26 per cent of asymptomatic children age 6 months to 2 years old<sup>1</sup>) and patients who have diverse disease states on which unrecognized herpes may super-

vene (burn patients treated with antibacterial agents,<sup>8</sup> measles,<sup>9</sup> kwashiorkor,<sup>9</sup> Hodgkin's disease, and Wiskott-Aldrich syndrome<sup>10</sup>).

# REFERENCES

1. Buddingh CJ, Schrum DI, Lanier JC, *et al.*: Studies of the natural history of herpes simplex infections. *Pediatrics* 11:593, 1952
2. Scott TF: Epidemiology of herpetic infections. *Amer J Ophthal* 43:134, 1957
3. Scott TF, Corriell LL, Blank H, *et al.*: Some comments on herpetic infections in children with some emphasis on unusual clinical manifestations. *J Pediat* 41:835, 1952
4. Findlay GM, MacCallum FO: Recurrent traumatic herpes. *Lancet* 1:259, 1940
5. Stern, H, Elek SD, Millar DM, *et al.*: Herpetic whitlow, a form of cross-infection in hospitals. *Lancet* 2:871, 1959
6. Hambrick GW, Cox RP, Senior JR: Primary herpes simplex infection of fingers of medical personnel. *Arch Derm* 85:583, 1962
7. Eaton RC, Butsch DP: Antibiotic guidelines for hand infections. *Surg Gynec Obstet* 130:119, 1970
8. Foley FD, Greenwald KA, Nash G, *et al.*: Herpesvirus infection in burned patients. *New Eng J Med* 282:652, 1970
9. Becker WB, Kipps A, McKenzie D: Disseminated herpes simplex virus infection: Its pathogenesis based on virological and pathological studies in 33 cases. *Amer J Dis Child* 115:1, 1968
10. St Geme JW Jr, Prince JT, Burke BA: Impaired cellular resistance to herpes-simplex virus in Wiskott-Aldrich syndrome. *New Eng J Med* 273:229, 1965

## Surgery

**HYPERCARBIA FOR CAROTID SURGERY** Carotid endarterectomies were performed without shunts in 137 patients. General anesthesia with methoxyflurane and *d*-tubocurarine was used, with CO<sub>2</sub> added. In 15 to 20 minutes the venous CO<sub>2</sub> tension reached 70 to 100 mm Hg without cardiac irritability or arrhythmias. In a previous series with cyclopropane, arrhythmias were a problem at this CO<sub>2</sub> tension. Advantages of the technique include lowered cerebral metabolism and oxygen requirement under general anesthesia; increased cerebral blood flow from the hypercarbia and hypertension; and avoidance of the encumbrance of the shunt apparatus. Good results were obtained in 93 per cent of patients. (Young, J. R., and others: *Carotid Endarterectomy without a Shunt*, *Arch. Surg.* 99: 293 (Sept.) 1969.)
